# Supplementary material for: Proximity to Oil Refineries and Risk of Cancer: A Population-Based Analysis
Source: PubMed Central journal article supplement — JNCI Cancer Spectr. 2020 Oct 7;4(6):pkaa088. doi: 10.1093/jncics/pkaa088 (PMC7691047; doi:10.1093/jncics/pkaa088), 2020-10-07
Supplement: pkaa088_supplementary_data.pdf [file pkaa088_supplementary_data.pdf]

**Supplementary Table 1. Data sources used in this study**

| Datasets                                             | Year      | Weblinks                                                                                                                                                              | Why we choose this data?                                                                                                                                          |
|------------------------------------------------------|-----------|-----------------------------------------------------------------------------------------------------------------------------------------------------------------------|-------------------------------------------------------------------------------------------------------------------------------------------------------------------|
| Texas Cancer Registry                                | 2001-2014 | n/a                                                                                                                                                                   | To get cancer cases                                                                                                                                               |
| 2010-2014 American Community Survey 5-year estimates | 2010-2014 | <a href="https://www.census.gov/data/developers/data-sets/acs-5year.2014.html">https://www.census.gov/data/developers/data-sets/acs-5year.2014.html</a>               | Age, sex, race, income and education at ZIP level (Income and education information became available from 2010 Census. It was not available in 2000 Census data). |
| County health rankings & roadmaps                    | 2016      | <a href="https://www.countyhealthrankings.org/app/texas/2016/measure/factors/9/map">https://www.countyhealthrankings.org/app/texas/2016/measure/factors/9/map</a>     | Smoking at county level estimated from 2014 data (More than 67% missing data on smoking for previous years)                                                       |
| County health rankings & roadmaps PM2.5              | 2013      | <a href="https://www.countyhealthrankings.org/app/texas/2019/measure/factors/125/map">https://www.countyhealthrankings.org/app/texas/2019/measure/factors/125/map</a> | 2013 data captures average daily PM2.5 from 2008 data                                                                                                             |
| Railroad commission of Texas                         | 2003      | <a href="https://www.rrc.state.tx.us/media/2122/oilwellct0903.pdf">https://www.rrc.state.tx.us/media/2122/oilwellct0903.pdf</a>                                       | Number of oil wells from 2003                                                                                                                                     |

**Supplementary Tale 2. List of 28 oil refineries**

| Refinery Location           | Corporate Owner                     | Zip Code | First operational | Years Inactive |
|-----------------------------|-------------------------------------|----------|-------------------|----------------|
| Baytown                     | Exxon Mobil Corporation             | 77520    | 1920              | Na             |
| Beaumont                    | Exxon Mobil Corporation             | 77701    | 1903              | Na             |
| Big Spring                  | Alon USA Energy Inc.                | 79720    | 2000              | Na             |
| Borger                      | WRB Refining, LLC                   | 79007    | 1926              | Na             |
| Channelview                 | Equistar Chemicals                  | 77049    | 1957              | Na             |
| Corpus Christi              | BTB Refining                        | 78409    | 2007              | 2013-Present   |
| Corpus Christi              | Citgo Petroleum Corporation         | 78401    | 1935              | Na             |
| Corpus Christi              | Flint Hills Resources               | 78409    | 1981              | Na             |
| Corpus Christi              | Valero Energy Corporation           | 78407    | 1983              | Na             |
| Deer Park                   | Deer Park Refining                  | 77536    | 1929              | Na             |
| El Paso                     | Western Refining Inc.               | 79905    | 1997              | Na             |
| Galena Park                 | Kinder Morgan                       | 77547    | 2015              | Na             |
| Galveston Bay of Texas City | Marathon Petroleum                  | 77590    | 1934              | Na             |
| Houston                     | Houston Refining LP                 | 77017    | 1918              | Na             |
| Houston                     | Valero Energy Corporation           | 77012    | 1942              | Na             |
| Sunray                      | Valero Energy Corporation           | 79086    | 1933              | Na             |
| Nixon                       | Lazarus Energy, LLC                 | 78140    | 1980              | 1993-2011      |
| Pasadena                    | Pasadena Refining                   | 77506    | 1919              | Na             |
| Port Arthur                 | Motiva Enterprises, LLC             | 77640    | 1902              | Na             |
| Port Arthur                 | Total Petrochemicals and Refining   | 77619    | 1936              | Na             |
| Port Arthur                 | Valero Energy Corporation           | 77640    | 1901              | Na             |
| San Antonio                 | Calumet Specialty Products Partners | 78223    | 1955              | Na             |
| Silsbee                     | South Hampton Resources             | 77656    | 1955              | Na             |
| Sweeny                      | Phillips 66                         | 77463    | 1942              | Na             |
| Texas City                  | Marathon Petroleum                  | 77590    | 1931              | Na             |
| Texas City                  | Valero Energy Corporation           | 77590    | 1908              | Na             |
| Three Rivers                | Valero Energy                       | 78071    | 1974              | Na             |

|       |                            |       |      |    |
|-------|----------------------------|-------|------|----|
|       | Corporation                |       |      |    |
| Tyler | Delek US Holdings,<br>Inc. | 75702 | 1923 | Na |

**Supplementary Table 3. Characteristics of cancer patients based on distance from an oil refinery**

| Characteristics              | Distance from oil refineries |             |             | P-value |
|------------------------------|------------------------------|-------------|-------------|---------|
|                              | 0-10 miles                   | 11-20 miles | 21-30 miles |         |
| Bladder cancer,<br>N =14924  |                              |             |             |         |
| Age, mean (SD)               | 71.0 (12.3)                  | 70.5 (12.2) | 69.6 (12.2) | <0.001  |
| Gender, N (%)                |                              |             |             | <0.001  |
| Male                         | 4016 (73.1)                  | 4255 (76.3) | 2868 (76.9) |         |
| Female                       | 1476 (26.9)                  | 1327 (23.7) | 864 (23.1)  |         |
| Race/ethnicity, N (%)        |                              |             |             | <0.001  |
| White                        | 4671 (85.1)                  | 5018 (89.9) | 3410 (91.4) |         |
| Black                        | 729 (13.3)                   | 370 (6.6)   | 165 (4.4)   |         |
| Other                        | 92 (1.7)                     | 194 (3.5)   | 157 (4.2)   |         |
| Cancer stage, N (%)          |                              |             |             | <0.001  |
| Localized                    | 4108 (74.8)                  | 4390 (78.6) | 2916 (78.1) |         |
| Regional                     | 400 (7.3)                    | 400 (7.2)   | 266 (7.1)   |         |
| Distant                      | 266 (4.8)                    | 204 (3.7)   | 135 (3.6)   |         |
| Unstaged                     | 718 (13.1)                   | 588 (10.5)  | 415 (11.1)  |         |
| Lung cancer,<br>N =58067     |                              |             |             |         |
| Age, mean (SD)               | 68.8(11.5)                   | 68.9(11.3)  | 68.3(11.4)  | <0.001  |
| Gender, N (%)                |                              |             |             | <0.001  |
| Male                         | 13116(56.4)                  | 11201(53.8) | 7477(54.4)  |         |
| Female                       | 10114(43.5)                  | 9606(46.1)  | 6258(45.5)  |         |
| Race/ethnicity, N (%)        |                              |             |             | <0.001  |
| White                        | 17525(75.4)                  | 17458(83.9) | 12141(88.3) |         |
| Black                        | 5337(22.9)                   | 2646(12.7)  | 1122(8.1)   |         |
| Other                        | 368(1.5)                     | 703(3.3)    | 472(3.4)    |         |
| Cancer stage, N (%)          |                              |             |             | 0.026   |
| Localized                    | 3768(16.2)                   | 3566(17.1)  | 2404(17.5)  |         |
| Regional                     | 4851(20.8)                   | 4331(20.8)  | 2886(21)    |         |
| Distant                      | 10645(45.8)                  | 9412(45.2)  | 6102(44.4)  |         |
| Unstaged                     | 3966(17.0)                   | 3498(16.8)  | 2343(17.0)  |         |
| Prostate cancer,<br>N =57603 |                              |             |             |         |
| Age, mean (SD)               | 67.5(10.1)                   | 66.4(9.9)   | 65.7(9.9)   | <0.001  |
| Gender, N (%)                |                              |             |             | <0.001  |
| Male                         | 20515(100)                   | 21614(100)  | 14572(100)  |         |
| Female                       |                              |             |             |         |
| Race/ethnicity, N (%)        |                              |             |             | <0.001  |
| White                        | 14987(73)                    | 17221(79.6) | 12258(84.1) |         |
| Black                        | 5002(24.3)                   | 3433(15.8)  | 1618(11.1)  |         |
| Other                        | 526(2.5)                     | 960(4.4)    | 696(4.7)    |         |

| Characteristics            | Distance from oil refineries |             |             | P-value |
|----------------------------|------------------------------|-------------|-------------|---------|
|                            | 0-10 miles                   | 11-20 miles | 21-30 miles |         |
| Cancer stage, N (%)        |                              |             |             | <0.001  |
| Localized                  | 14002(68.2)                  | 15399(71.2) | 10159(69.7) |         |
| Regional                   | 1789(8.7)                    | 2105(9.7)   | 1444(9.9)   |         |
| Distant                    | 1080(5.2)                    | 856(3.9)    | 547(3.7)    |         |
| Unstaged                   | 3644(17.7)                   | 3254(15)    | 2422(16.6)  |         |
| Breast cancer,<br>N =80685 |                              |             |             |         |
| Age, mean (SD)             | 61(13.8)                     | 59.7(13.5)  | 58.8(13.2)  | <0.001  |
| Gender, N (%)              |                              |             |             |         |
| Male                       |                              |             |             |         |
| Female                     | 28733(100)                   | 31113(100)  | 20358(100)  |         |
| Race/ethnicity, N (%)      |                              |             |             | <0.001  |
| White                      | 22161(77.1)                  | 25361(81.5) | 17077(83.8) |         |
| Black                      | 5895(20.5)                   | 4371(14)    | 2004(9.8)   |         |
| Other                      | 677(2.3)                     | 1381(4.4)   | 1277(6.2)   |         |
| Cancer stage, N (%)        |                              |             |             | <0.001  |
| Localized                  | 17720(61.6)                  | 20303(65.2) | 13214(64.9) |         |
| Regional                   | 7189(25)                     | 7122(22.8)  | 4662(22.9)  |         |
| Distant                    | 1636(5.6)                    | 1497(4.8)   | 938(4.6)    |         |
| Unstaged                   | 2188(7.6)                    | 2191(7)     | 1544(7.5)   |         |
| Colon cancer,<br>N =32283  |                              |             |             |         |
| Age, mean (SD)             | 67.8(13.7)                   | 66.5(13.9)  | 65.9(14)    | <0.001  |
| Gender, N (%)              |                              |             |             | 0.094   |
| Male                       | 6516(50.4)                   | 5939(51.1)  | 3921(51.9)  |         |
| Female                     | 6411(49.5)                   | 5681(48.8)  | 3623(48)    |         |
| Race/ethnicity, N (%)      |                              |             |             | <0.001  |
| White                      | 9476(73.3)                   | 9390(80.8)  | 6310(83.6)  |         |
| Black                      | 3215(24.8)                   | 1784(15.3)  | 796(10.5)   |         |
| Other                      | 236(1.8)                     | 446(3.8)    | 438(5.8)    |         |
| Cancer stage, N (%)        |                              |             |             | 0.064   |
| Localized                  | 4623(35.7)                   | 4118(35.4)  | 2686(35.6)  |         |
| Regional                   | 4241(32.8)                   | 3974(34.1)  | 2495(33)    |         |
| Distant                    | 2603(20.1)                   | 2227(19.1)  | 1446(19.1)  |         |
| Unstaged                   | 1460(11.2)                   | 1301(11.1)  | 917(12.1)   |         |
| Lymphoma,<br>N =40029      |                              |             |             |         |
| Age, mean (SD)             | 63.8(16.6)                   | 63(16.7)    | 62.7(16.1)  | <0.001  |
| Gender, N (%)              |                              |             |             | 0.005   |
| Male                       | 7988(53.1)                   | 8068(54.2)  | 5197(55.2)  |         |
| Female                     | 7035(46.8)                   | 6793(45.7)  | 4203(44.7)  |         |
| Race/ethnicity, N (%)      |                              |             |             | <0.001  |
| White                      | 11988(79.7)                  | 12479(83.9) | 8126(86.4)  |         |

| Characteristics     | Distance from oil refineries |             |             | P-value |
|---------------------|------------------------------|-------------|-------------|---------|
|                     | 0-10 miles                   | 11-20 miles | 21-30 miles |         |
| Black               | 2702(17.9)                   | 1808(12.1)  | 821(8.7)    |         |
| Other               | 333(2.2)                     | 574(3.8)    | 453(4.8)    |         |
| Cancer stage, N (%) |                              |             |             | <0.001  |
| Localized           | 1705(11.3)                   | 1886(12.6)  | 1090(11.5)  |         |
| Regional            | 1005(6.6)                    | 1040(6.9)   | 654(6.9)    |         |
| Distant             | 10302(68.5)                  | 9838(66.2)  | 6180(65.7)  |         |
| Unstaged            | 2011(13.3)                   | 2097(14.1)  | 1476(15.7)  |         |

\* Localized includes in situ and localized cancer.

\*\* Regional includes regional by direct extension only, regional lymph nodes only, Regional (direct extension and regional lymph nodes) and regional not specified

\*\*\* Distant includes distant metastasis and/or systemic disease

**Supplementary Table 4. Adjusted association of proximity to an oil refinery and cancer risk in elderly (65 years and older), males, and female population, and restricting to cancer cases in 2010-2014**

| Distance from Oil Refinery (Miles) | Risk Ratio for Each Cancer Site (95% CI)       |                     |                     |                     |                     |                     |
|------------------------------------|------------------------------------------------|---------------------|---------------------|---------------------|---------------------|---------------------|
|                                    | Bladder                                        | Lung                | Prostate            | Breast              | Colon               | Lymphoma            |
|                                    | Cancer cases and ACS population from 2010-2014 |                     |                     |                     |                     |                     |
| 0-10                               | 1.02<br>(0.94-1.11)                            | 1.15<br>(1.00-1.33) | 1.02<br>(0.98-1.06) | 1.02<br>(0.96-1.09) | 1.03<br>(0.96-1.11) | 1.05<br>(0.99-1.11) |
| 11-20                              | 0.93<br>(0.86-1.01)                            | 1.02<br>(0.88-1.18) | 0.99<br>(0.95-1.04) | 1.00<br>(0.94-1.07) | 0.97<br>(0.90-1.04) | 0.98<br>(0.92-1.03) |
| 21-30                              | Ref                                            | Ref                 | Ref                 | Ref                 | Ref                 | Ref                 |
|                                    | Older adults (60 years or older)               |                     |                     |                     |                     |                     |
| 0-10                               | 1.10<br>(1.05-1.57)                            | 1.07<br>(1.05-1.10) | 1.09<br>(1.06-1.11) | 1.12<br>(1.09-1.15) | 1.14<br>(1.10-1.18) | 1.13<br>(1.09-1.17) |
| 11-20                              | 1.05<br>(1.00-1.10)                            | 1.01<br>(0.99-1.04) | 1.07<br>(1.04-1.10) | 1.09<br>(1.07-1.12) | 1.02<br>(0.98-1.06) | 1.06<br>(1.03-1.10) |
| 21-30                              | Ref                                            | Ref                 | Ref                 | Ref                 | Ref                 | Ref                 |
|                                    | Younger adults (20 to 59 years).               |                     |                     |                     |                     |                     |
| 0-10                               | 1.08<br>(0.93-1.26)                            | 1.09<br>(0.96-1.25) | 1.03<br>(0.93-1.15) | 1.10<br>(1.02-1.19) | 0.93<br>(0.83-1.05) | 1.07<br>(0.98-1.17) |
| 11-20                              | 1.05<br>(0.91-1.22)                            | 0.99<br>(0.87-1.13) | 1.03<br>(0.92-1.14) | 1.03<br>(0.96-1.11) | 0.90<br>(0.80-1.00) | 1.03<br>(0.94-1.12) |
| 21-30                              | Ref                                            | Ref                 | Ref                 | Ref                 | Ref                 | Ref                 |
|                                    | Male                                           |                     |                     |                     |                     |                     |
| 0-10                               | 1.05<br>(0.97-1.13)                            | 1.13<br>(1.05-1.22) | --                  | --                  | 1.08<br>(1.01-1.16) | 1.14<br>(1.07-1.20) |
| 11-20                              | 1.03<br>(0.96-1.11)                            | 1.04<br>(0.96-1.12) | --                  | --                  | 0.99<br>(0.92-1.06) | 1.06<br>(1.00-1.12) |
| 21-30                              | Ref                                            | Ref                 | Ref                 | Ref                 | Ref                 | Ref                 |
|                                    | Female                                         |                     |                     |                     |                     |                     |
| 0-10                               | 1.13<br>(1.02-1.26)                            | 1.09<br>(1.01-1.18) | --                  | --                  | 1.12<br>(1.04-1.20) | 1.14<br>(1.07-1.21) |
| 11-20                              | 1.03<br>(0.92-1.15)                            | 1.07<br>(0.99-1.66) | --                  | --                  | 1.02<br>(0.95-1.10) | 1.06<br>(1.00-1.12) |
| 21-30                              | Ref                                            | Ref                 | Ref                 | Ref                 | Ref                 | Ref                 |

Model included age, sex, race/ethnicity, income, smoking, oil wells, and PM2.5
